# Supplementary material for: A flow immunoassay for alkylphenol ethoxylate surfactants and their metabolites—questions associated with cross-reactivity, matrix effects, and validation by chromatographic techniques
Source: Royal Society of Chemistry journal article supplement (doi:10.1039/b302110f), 2003-01-01
Supplement: table1.doc [file table1.doc]

Cross reactivity (CR a) of the immunoassay for compounds from the APEO and APEC classes.

| **Analyte** | | **LOD**  **µg l-1** | **IC50**  **µg l-1 nM-1** | | **CR, %** |
| --- | --- | --- | --- | --- | --- |
| NPEO10 | | 2.40 | 24.5 | 37.2 | 100 |
| NPEO9.5 | | 3.06 | 16.5 | 26.0 | 148.2 |
| NPEO8 | | 2.25 | 24.8 | 43.5 | 98.6 |
| NPEO7 | | 2.89 | 26.8 | 50.9 | 109.3 |
| NPEO5 | | 2.17 | 26.4 | 60.0 | 92.9 |
| OPEO8 | | 1.60 | 8.5 | 15.3 | 287.3 |
| OPEO10 | | 0.45 | 17.7 | 27.4 | 178.9 |
| NPEC1 | | 63.5 | 962.9 | 3126 | 2.5 |
| NPEC2 | | 2.78 | 24.2 | 68.8 | 101.2 |
| NP | | 51.5 | 1033 | 4717 | 2.37 |
| Phenol | Not detectable | | | | 0 |

a CR was defined as the ratio between the IC50 for NPEO10 and the IC50 for each of the other compounds tested.

ABBREVIATIONS

The limit of detection (LOD) was estimated as the concentration of the analyte that gives a change in signal equal to 3 times the standard deviation of the signal at zero dose (*i.e.,* 1.03% for 21 replicates).

Inhibition concentration at 50% binding (IC50) is the analyte concentration which leads to 50% change in signal *vs.* the response in the absence of the analyte.

CONDITIONS

Injection volume: 50 µl; mixing coil volume: 1875 µl; flow rate: 0.375 + 0.375 ml min-1; carrier: 10 mM phosphate buffer pH 7.4, containing 150 mM NaCl, and 0.01 % (v/v) Tween 20 (PBST); substrate carrier: 1.57 mg l-1 2-NPG in PBST, also containing 2 mM·MgCl2; detection 405 nm.
